# Supplementary material for: Nitrogen Fertilizer Driven Bacterial Community Structure in a Semi-Arid Region of Northeast China
Source: MDPI journal article supplement (doi:10.3390/su132111967), 2021-10-29
Supplement: s1 [file s1]

**Table S1.** Illumina MiSeq sequenced bacterial data (at 97% sequence similarity) based on the 16S rRNA gene.

| <b>Sample</b> | <b>Sequences</b> | <b>Bases(bp)</b> | <b>AverageLength(bp)</b> | <b>OTU</b> |
|---------------|------------------|------------------|--------------------------|------------|
| N0_1          | 51025            | 19233244         | 376.94                   | 3314       |
| N0_2          | 49889            | 18800111         | 376.84                   | 3286       |
| N0_3          | 56869            | 21432675         | 376.88                   | 3385       |
| N1_1          | 58245            | 21952210         | 376.89                   | 3507       |
| N1_2          | 52106            | 19640197         | 376.93                   | 3350       |
| N1_3          | 47758            | 18002357         | 376.95                   | 3299       |
| N2_1          | 42656            | 16077789         | 376.92                   | 3283       |
| N2_2          | 44601            | 16807312         | 376.84                   | 3290       |
| N2_3          | 47879            | 18043097         | 376.85                   | 3343       |
| N3_1          | 48645            | 18336209         | 376.94                   | 3357       |
| N3_2          | 45727            | 17228439         | 376.77                   | 3025       |
| N3_3          | 41102            | 15495430         | 377                      | 3111       |
| N4_1          | 41352            | 15589396         | 376.99                   | 3181       |
| N4_2          | 55213            | 20813666         | 376.97                   | 3391       |
| N4_3          | 48155            | 18153711         | 376.98                   | 3352       |

N0, N1, N2, N3, and N4 represent N fertilizer was used at a level of 0, 90, 150, 210, and 270 kg ha<sup>-1</sup>, respectively.

**Table S2.** Relative abundance (%) at bacterial phyla level under different N gradients.

|                 | Treatment | Proteobacteria  | Gemmatimonadetes | Bacteroidetes | Nitrospirae | Firmicutes | Deinococcus-Thermus | Omnitrophicaeota |
|-----------------|-----------|-----------------|------------------|---------------|-------------|------------|---------------------|------------------|
|                 | N0        | 27.08           | 4.48             | 3.22          | 0.93        | 0.46       | 0.04                | 0.03             |
|                 | N1        | 26.56           | 4.97             | 2.78          | 1.12        | 0.59       | 0.01                | 0.02             |
|                 | N2        | 28.05           | 5.30             | 3.11          | 1.40        | 0.64       | 0.06                | 0.04             |
|                 | N3        | 28.83           | 4.20             | 2.26          | 1.20        | 1.55       | 0.01                | 0.03             |
|                 | N4        | 25.20           | 5.09             | 2.63          | 1.36        | 0.75       | 0.05                | 0.05             |
|                 | N0 vs N1  | ns <sup>a</sup> | ns               | ns            | ns          | ns         | ns                  | 0.013            |
| <i>P</i> -value | N0 vs N2  | ns              | 8.77E-03         | ns            | 0.044       | ns         | ns                  | ns               |
|                 | N0 vs N3  | ns              | ns               | 0.031         | ns          | 0.025      | 0.038               | ns               |
|                 | N0 vs N4  | 0.032           | 8.78E-04         | ns            | ns          | 4.47E-03   | ns                  | ns               |

<sup>a</sup>ns, not significant; *P* at 95% confidence intervals, Student's *t*-test, equal variance.

N0, N1, N2, N3, and N4 represent N fertilizer was used at a level of 0, 90, 150, 210, and 270 kg ha<sup>-1</sup>, respectively.

**Table S3.** The statistical analysis base on Weighted-Unifrac for distance of bacterial community beta diversity among different N gradients

| Treatment | <i>t</i> statistic | Parametric <i>P</i> -value |
|-----------|--------------------|----------------------------|
| N0 vs. N1 | -2.413             | 0.037                      |
| N0 vs. N2 | -3.851             | 0.003                      |
| N0 vs. N3 | -2.427             | 0.036                      |
| N0 vs. N4 | -3.878             | 0.003                      |
| N1 vs. N2 | -3.265             | 0.009                      |
| N1 vs. N3 | -1.812             | 0.100                      |
| N1 vs. N4 | -2.893             | 0.016                      |
| N2 vs. N3 | -3.182             | 0.010                      |
| N2 vs. N4 | -6.655             | 0.000                      |
| N3 vs. N4 | -1.792             | 0.103                      |

The tests of significance were performed using a two-sided Student's two-sample *t*-test.

**Table S4.** The statistical analysis and LDA score of different genera under five N fertilizer levels

| Taxonomy                                                                                     | Treatment | LDA score | <i>P</i> value |
|----------------------------------------------------------------------------------------------|-----------|-----------|----------------|
| Bacteria.Proteobacteria.Gammaproteobacteria.Betaproteobacteriales.Burkholderiaceae.Comamonas | N1        | 2.875     | 0.032          |
| Bacteria.Firmicutes.Bacilli.Bacillales.Bacillaceae.Bacillus                                  | N3        | 3.192     | 0.017          |
| Bacteria.Proteobacteria.Deltaproteobacteria.Bdellovibrionales                                | N4        | 2.783     | 0.013          |
| Bacteria.Deinococcus_Thermus.Deinococci.Deinococcales.Deinococcaceae.Deinococcus             | N2        | 2.527     | 0.039          |
| Bacteria.Deinococcus_Thermus                                                                 | N2        | 2.545     | 0.036          |
| Bacteria.Proteobacteria.Gammaproteobacteria.Betaproteobacteriales.Nitrosomonadaceae.MND1     | N4        | 3.354     | 0.048          |
| Bacteria.Proteobacteria.Deltaproteobacteria.Myxococcales.Haliangiaceae                       | N4        | 2.844     | 0.038          |
| Bacteria.Verrucomicrobia.Verrucomicrobiae.Opitutales.Opitutaceae                             | N4        | 2.587     | 0.025          |
| Bacteria.Gemmatimonadetes                                                                    | N2        | 3.884     | 0.036          |
| Bacteria.Plactomycetes.Plactomycetacia.Pirellulales                                          | N4        | 2.937     | 0.014          |
| Bacteria.Chloroflexi.Chloroflexia.Thermomicrobiales.JG30_KF_CM45                             | N1        | 3.101     | 0.042          |
| Bacteria.Deinococcus_Thermus.Deinococci.Deinococcales                                        | N2        | 2.552     | 0.036          |
| Bacteria.Bacteroidetes.Bacteroidia.Sphingobacteriales.env_OPS_17                             | N4        | 2.580     | 0.031          |
| Bacteria.Verrucomicrobia.Verrucomicrobiae.Opitutales.Opitutaceae.Opitutus                    | N4        | 2.456     | 0.038          |
| Bacteria.Proteobacteria.Gammaproteobacteria.Xanthomonadales.Xanthomonadaceae.Luteimonas      | N3        | 2.577     | 0.036          |
| Bacteria.Proteobacteria.Gammaproteobacteria.R7C24                                            | N0        | 2.760     | 0.031          |
| Bacteria.Verrucomicrobia                                                                     | N2        | 2.900     | 0.049          |
| Bacteria.Firmicutes.Bacilli.Bacillales.Bacillaceae                                           | N3        | 3.420     | 0.017          |
| Bacteria.Deinococcus_Thermus.Deinococci.Deinococcales.Deinococcaceae                         | N2        | 2.522     | 0.039          |
| Bacteria.Firmicutes                                                                          | N3        | 3.738     | 0.021          |
| Bacteria.Plactomycetes.Plactomycetacia.Pirellulales.Pirellulaceae.Pirellula                  | N4        | 2.979     | 0.050          |
| Bacteria.Proteobacteria.Deltaproteobacteria.Myxococcales.Haliangiaceae.Haliangium            | N4        | 2.903     | 0.038          |

|                                                                                                       |    |       |       |
|-------------------------------------------------------------------------------------------------------|----|-------|-------|
| Bacteria.Firmicutes.Bacilli                                                                           | N3 | 3.761 | 0.021 |
| Bacteria.Gemmatimonadetes.Gemmatimonadetes.Gemmatimonadales.Gemmatimonadaceae                         | N2 | 3.795 | 0.032 |
| Bacteria.Gemmatimonadetes.Gemmatimonadetes.Gemmatimonadales                                           | N2 | 3.795 | 0.032 |
| Bacteria.Verrucomicrobia.Verrucomicrobiae                                                             | N2 | 2.906 | 0.049 |
| Bacteria.Acidobacteria.Acidobacteriia                                                                 | N2 | 3.222 | 0.028 |
| Bacteria.Deinococcus_Thermus.Deinococci                                                               | N2 | 2.522 | 0.036 |
| Bacteria.Chloroflexi.Chloroflexia.Thermomicrobiales.AKYG1722                                          | N4 | 2.635 | 0.043 |
| Bacteria.Patescibacteria.Saccharimonadia.Saccharimonadales                                            | N4 | 2.613 | 0.042 |
| Bacteria.Gemmatimonadetes.Gemmatimonadetes.Gemmatimonadales.Gemmatimonadaceae.Gemmatimonas            | N2 | 3.245 | 0.031 |
| Bacteria.Proteobacteria.Gammaproteobacteria.Diplorickettsiales.Diplorickettsiaceae.Aquicella          | N4 | 2.842 | 0.034 |
| Bacteria.Verrucomicrobia.Verrucomicrobiae.Opitutales                                                  | N4 | 2.657 | 0.025 |
| Bacteria.Acidobacteria.Blastocatellia_Subgroup_4.Blastocatellales.Blastocatellaceae.Stenotrophobacter | N0 | 2.696 | 0.033 |
| Bacteria.Gemmatimonadetes.Gemmatimonadetes                                                            | N2 | 3.817 | 0.032 |
| Bacteria.Actinobacteria.Acidimicrobiia.Microtrichales                                                 | N1 | 3.234 | 0.035 |
| Bacteria.Patescibacteria                                                                              | N4 | 2.719 | 0.027 |
| Bacteria.Proteobacteria.Alphaproteobacteria.Micavibrionales.Micavibrionaceae                          | N4 | 2.491 | 0.037 |
| Bacteria.Firmicutes.Bacilli.Bacillales                                                                | N3 | 3.741 | 0.021 |
| Bacteria.Bacteroidetes.Bacteroidia.Chitinophagales.Chitinophagaceae.Segetibacter                      | N2 | 2.726 | 0.033 |
| Bacteria.Plactomycetes.Plactomycetacia.Pirellulales.Pirellulaceae                                     | N4 | 3.059 | 0.014 |
| Bacteria.Patescibacteria.Saccharimonadia                                                              | N4 | 2.597 | 0.042 |
| Bacteria.Chloroflexi.Ktedonobacteria                                                                  | N4 | 3.038 | 0.043 |

LDA score > 2.0. *P* at 95% confidence intervals tested by one-way ANOVA .
