# Supplementary material for: Nitrogen Fertilizer Driven Bacterial Community Structure in a Semi-Arid Region of Northeast China
Source: MDPI journal article supplement (doi:10.3390/su132111967), 2021-10-29
Supplement: s1 [file s1]

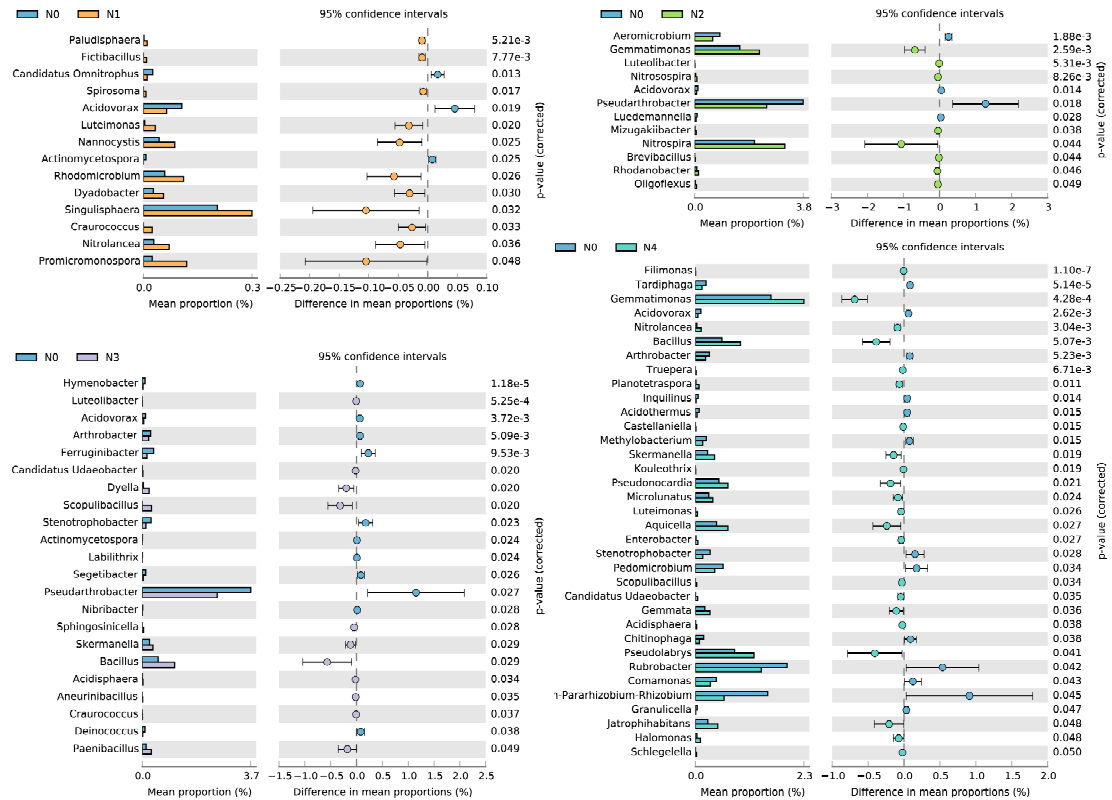

**Figure S1.** The relative abundances of bacterial genera between different N gradients (N1, N2, N3 and N4) and the control (N0) (at 95% confidence intervals, Student's *t*-test, equal variance). N0, N1, N2, N3, and N4 represent N fertilizer was used at a level of 0, 90, 150, 210, and 270 kg ha<sup>-1</sup>, respectively.

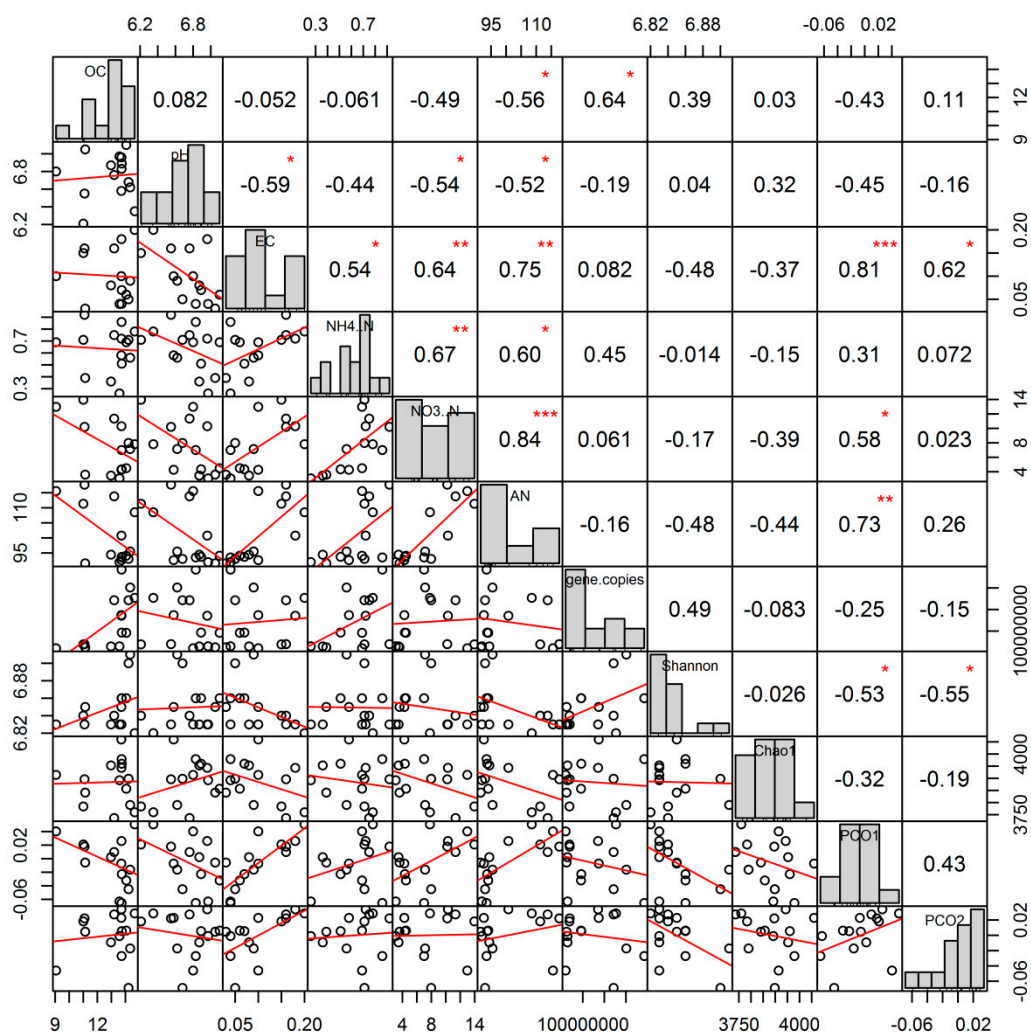

**Figure S2.** Correlation coefficients between soil properties and bacterial community significant correlations (\*  $0.01 < P < 0.05$ , \*\*  $0.001 < P < 0.01$ , \*\*\*  $P < 0.001$ ).

OC: soil organic carbon, EC: soil electrical conductivity, NH<sub>4</sub><sup>+</sup>-N: soil ammonium nitrogen, NO<sub>3</sub><sup>-</sup>-N: soil nitrate nitrogen, AN: soil available nitrogen.
